# Supplementary figures and images for: A comparison of respondent-driven and venue-based sampling of female sex workers in Liuzhou, China
Source: HighWire-hosted journal article supplement (doi:10.1136/sextrans-2012-050638), 2012-11-20

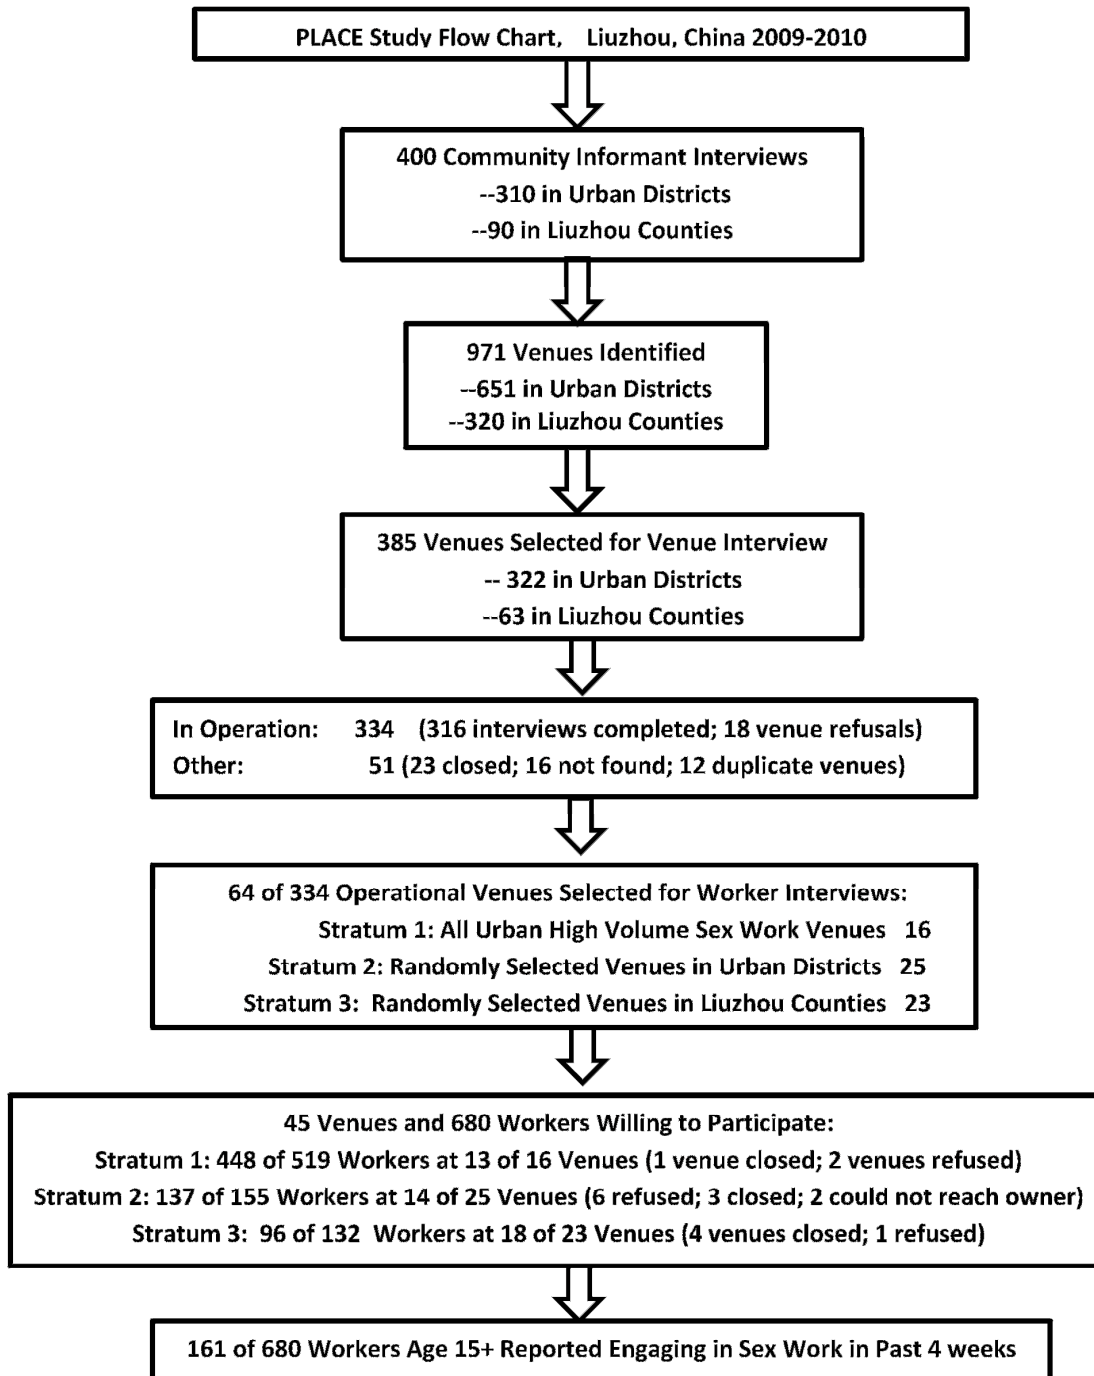

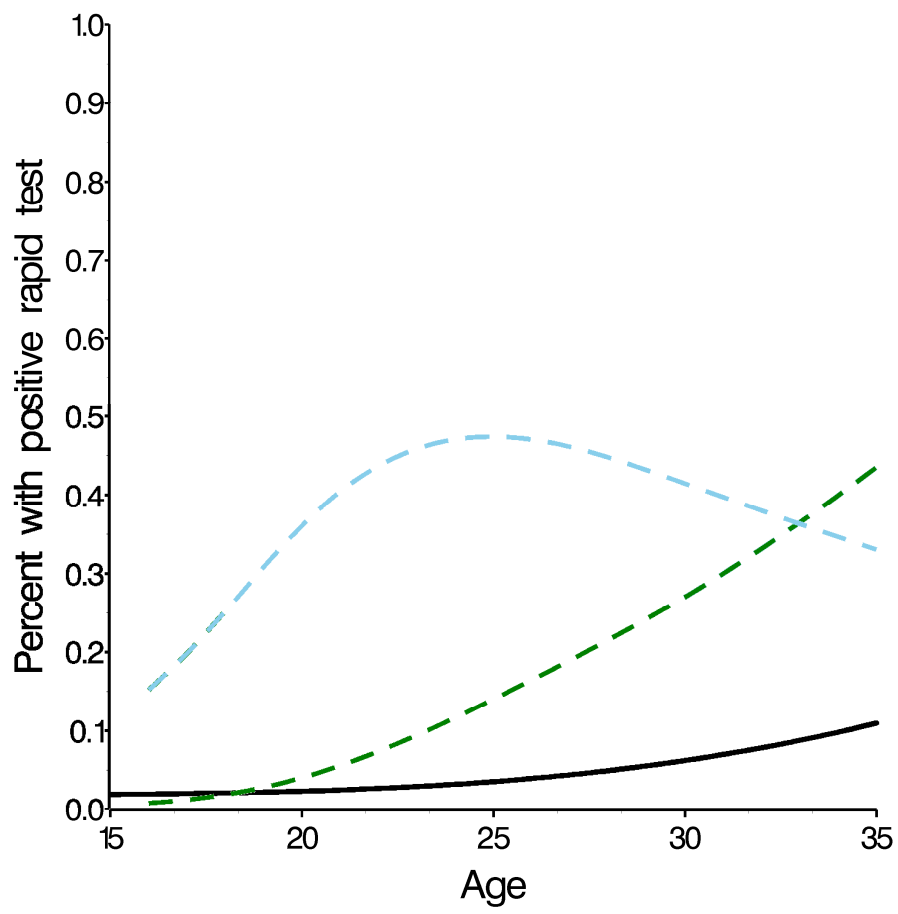

Supplement: sextrans-2012-050638supp2.pdf [file sextrans-2012-050638supp2.pdf]
